# Supplementary material for: Pt(iv) prodrug-backboned micelle and DCA loaded nanofibers for enhanced local cancer treatment
Source: Royal Society of Chemistry journal article supplement (doi:10.1039/c7tb00178a), 2017-01-01
Supplement: c7tb00178a1.pdf [file c7tb00178a1.pdf]

## **Supporting information**

### **Pt(IV) prodrug-backboned micelle and DCA loaded nanofibers for enhanced local cancer treatment**

Zhiyun Zhang,<sup>ab</sup> Yanjuan Wu,<sup>ab</sup> Gaizhen Kuang,<sup>c</sup> Shi Liu,<sup>a</sup> Dongfang Zhou,<sup>\*a</sup> Xuesi Chen,<sup>d</sup> Xiabin Jing<sup>a</sup> and Yubin Huang<sup>\*a</sup>

<sup>a</sup> State Key Laboratory of Polymer Physics and Chemistry Changchun Institute of Applied Chemistry, Chinese Academy of Sciences, Changchun 130022, P. R. China

<sup>b</sup> University of Chinese Academy of Sciences, Beijing 100049, P. R. China

<sup>c</sup> Department of Gastroenterology, the Second Affiliated Hospital, Medical School of Xi'an Jiaotong University, Xi'an, 710048, P. R. China

<sup>d</sup> Key Laboratory of Polymer Ecomaterials, Changchun Institute of Applied Chemistry, Chinese Academy of Sciences, Changchun 130022, P. R. China

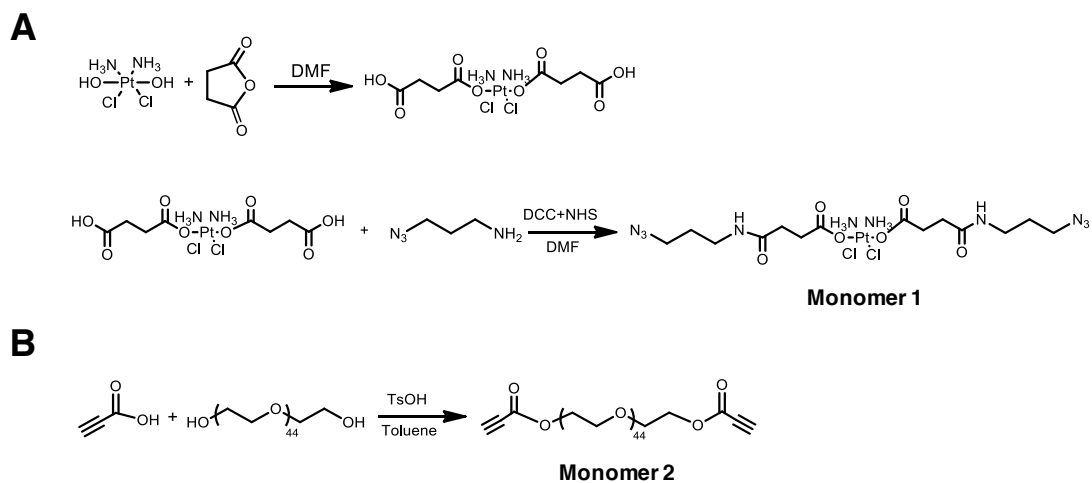

**Scheme S1** Synthesis pathway for clickable monomer **1** diazide-terminate Pt(IV) (A) and (B) dialkyne-terminate PEG<sub>2k</sub> monomer **2**.

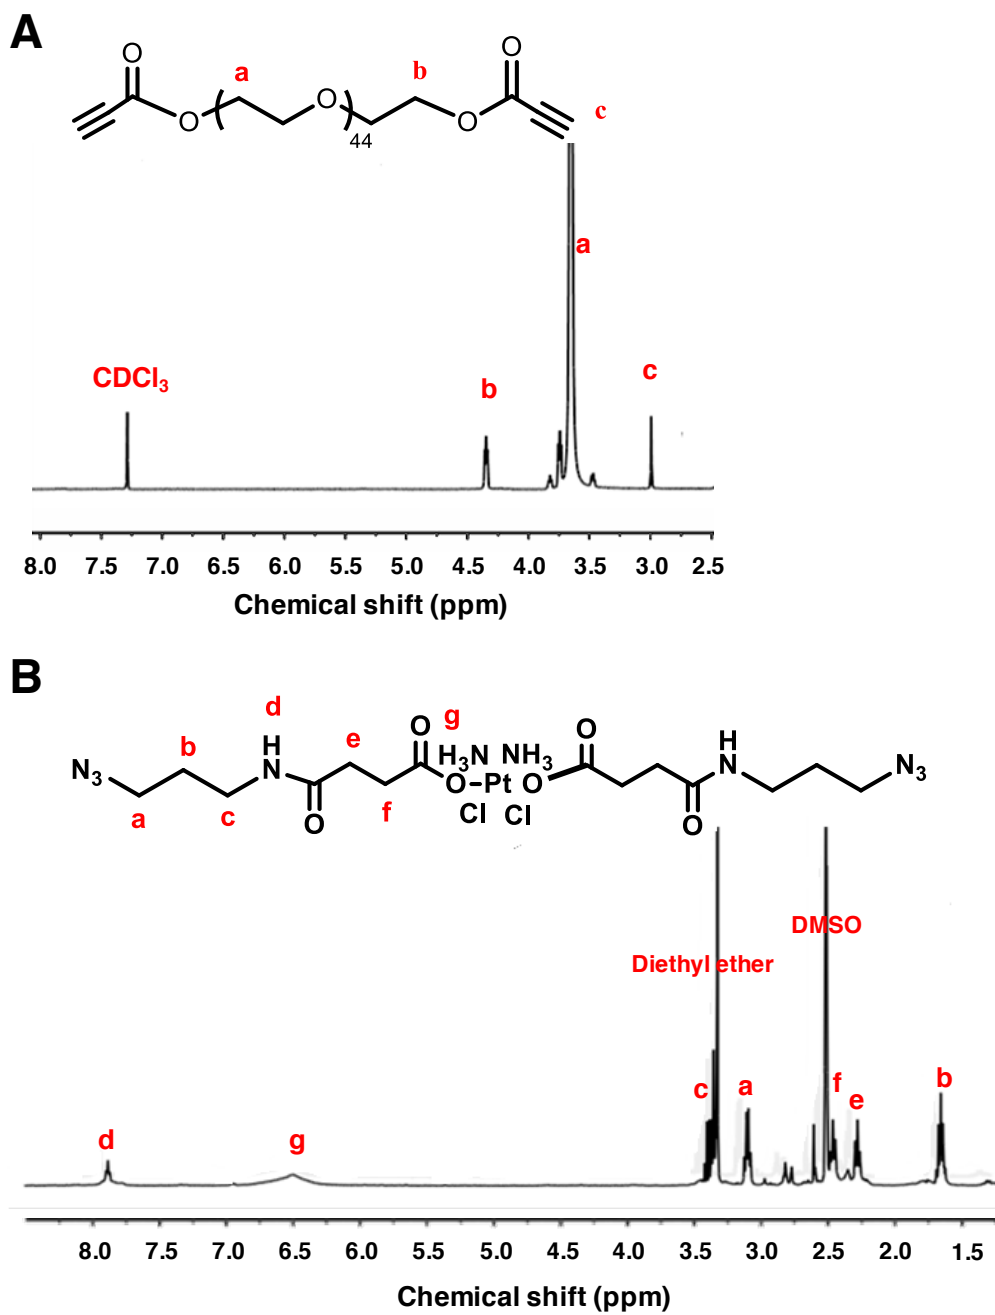

**Figure. S1**  $^1\text{H}$  NMR characterization of diazide-terminate Pt(IV) (A) and dialkyne-terminate PEG<sub>2k</sub> (B) in  $\text{CDCl}_3$  and  $\text{DMSO-d}_6$ .

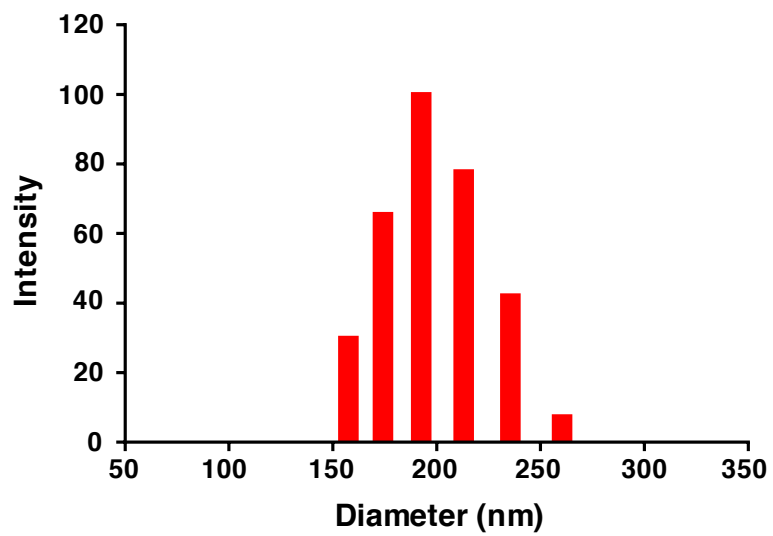

**Fig. S2** Diameter distribution of micelles released from M/DCA-fibers in PBS (pH = 7.4).

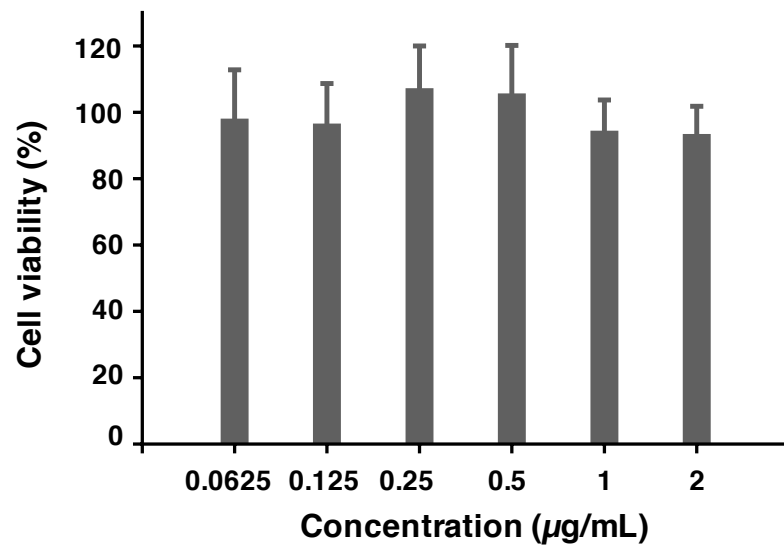

**Fig. S3** L929 cell viability after incubation with PVA nanofibers for 72 h.

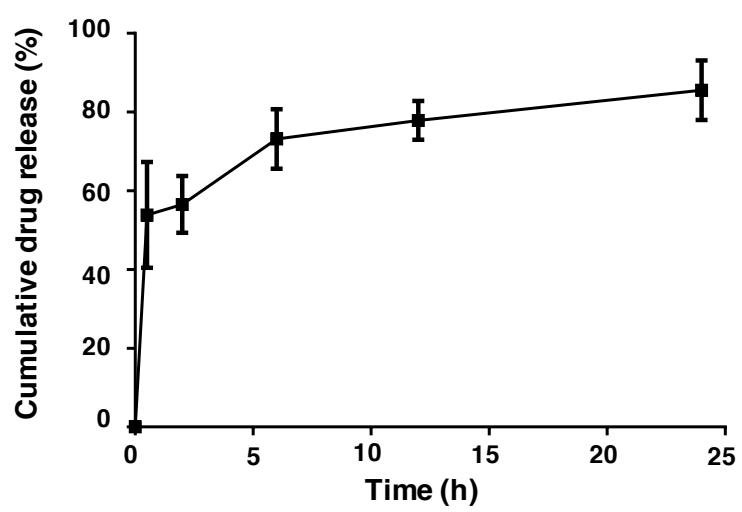

Fig. S4 Release profiles of Pt from M/DCA-fibers *in vivo*.
